# Supplementary material for: Lipid-based systems loaded with PbS nanocrystals: near infrared emitting trackable nanovectors
Source: Royal Society of Chemistry journal article supplement (doi:10.1039/c6tb02590k), 2017-01-01
Supplement: c6tb02590k1.pdf [file c6tb02590k1.pdf]

## Electronic Supplementary Information (ESI) for Journal of Materials Chemistry B. This journal is © The Royal Society of Chemistry 2016

### Lipid Based Systems Loaded with PbS Nanocrystals as Near Infrared Emitting Trackable Nanovectors

N. Depalo<sup>a†\*</sup>, V. De Leo<sup>a,b†\*</sup>, M. Corricelli<sup>a</sup>, R. Gristina<sup>c</sup>, G. Valente<sup>a,b</sup>, E. Casamassima<sup>b</sup>, R. Comparelli<sup>a</sup>, V. Laquintana<sup>d</sup>, N. Denora<sup>d</sup>, E. Fanizza<sup>b</sup>, M. Striccoli<sup>a</sup>, A. Agostiano<sup>a,b</sup>, L. Catucci<sup>b</sup>, M. L. Curri<sup>a</sup>

<sup>a</sup> Istituto per i Processi Chimico-Fisici-CNR UOS Bari, Via Orabona 4, 70125 - Bari, Italy.

<sup>b</sup> Università degli Studi di Bari Aldo Moro, Dipartimento di Chimica, Via Orabona 4, 70125 - Bari, Italy.

<sup>c</sup> CNR, Institute of Nanotechnology (NANOTEC), Dipartimento di Chimica, Università degli Studi di Bari Aldo Moro Via Orabona 4, 70125 - Bari, Italy.

<sup>d</sup> Università degli Studi di Bari Aldo Moro, Dipartimento di Farmacia – Scienze del Farmaco, Via Orabona 4, 70125 - Bari, Italy.

† These authors contributed equally

\* Corresponding authors n.depalo@ba.ipcf.cnr.it, v.deleo@ba.ipcf.cnr.it

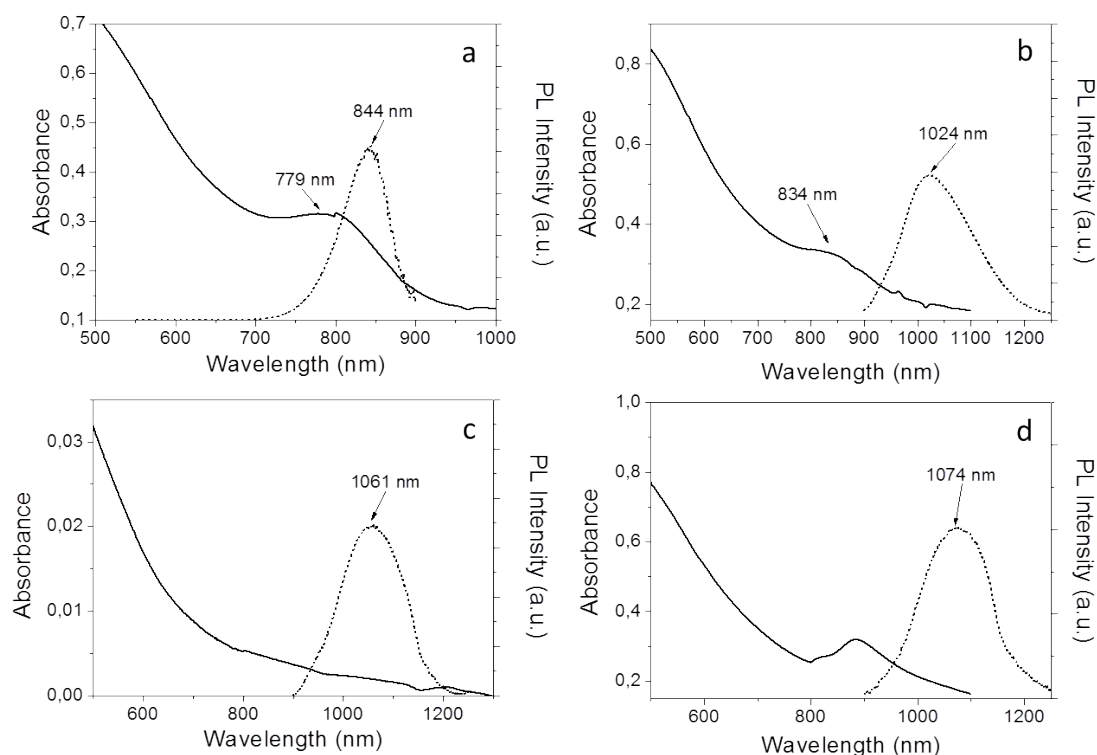

**Figure S1.** Comparison of the vis-NIR absorption and PL spectra ( $\lambda_{\text{ex}}=650$  nm) for the (a) OLEA-, (b) DDT-capped PbS NCs, (c) PbS NC-MIC and (d) PbS NC-LIP.

The Figure S1 shows the comparison of the vis-NIR absorption and PL spectra for the OLEA-, DDT-capped PbS NCs, PbS NC-MIC and PbS NC-LIP. The Stokes Shift results equal to 65 nm and 190 nm for the OLEA- and DDT-capped PbS NCs, respectively.

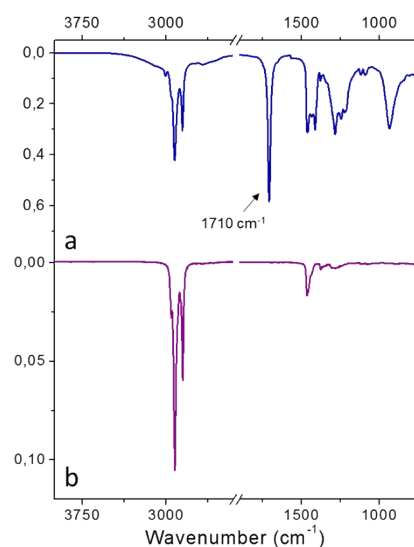

**Figure S2.** FTIR-ATR spectrum of pure OLEA (a) and pure DDT (b), cast from chloroform.

In the Figure S2 can be observed the FTIR-ATR spectrum of pure OLEA (a) and of pure DDT (b). Here, the broad band between 3500 and 2500  $\text{cm}^{-1}$  can be ascribed to the O-H stretching of the carboxylic group. The intense peak at 1710  $\text{cm}^{-1}$  and the band at 1284  $\text{cm}^{-1}$  can be respectively attributable to C=O and C-O stretching of the carboxylic group, while the bands at 1412  $\text{cm}^{-1}$  and at 935  $\text{cm}^{-1}$  can be assigned to the O-H in-plane and out-of-plane stretching, respectively.
